# Supplementary material for: Single-cell transcriptome profiling of the stepwise progression of head and neck cancer
Source: Springer Nature journal article supplement (doi:10.1038/s41467-023-36691-x), 2023-02-24
Supplement: MOESM1 [file 41467_2023_36691_MOESM1_ESM.pdf]

## SUPPLEMENTARY INFORMATION

### Supplementary Methods

#### Processing and clustering of scRNA-seq data

The raw data of the gene expression matrix was filtered using the "Seurat" R package with the following criteria of the cells with > 200 genes and < 8000 genes, < 10% of mitochondrial gene expression in UMI counts, and the genes expressed in > 0.1% cells. The batch effects of the samples were corrected using 'RunHarmony' in the "Harmony" R package, dimension reduction was performed using UMAP with the 'RunUMAP' function (dims = 1:50), and the clustering was performed using a shared-nearest neighbor graph algorithm 'FindClusters' function (resolution = 0.2). Subtyping of the malignant cells, cancer-associated fibroblasts (CAFs), and T cells were performed using the following parameters. For malignant cells, dims = 1:20, lambda = 1, theta = 0, and resolution = 0.05; for CAFs, dims = 1:10, lambda = 1, theta = 0, and resolution = 0.2; for T cells, dim = 1:50, lambda = 1, theta = 2, and resolution = 0.2.

#### Cell typing, deconvolution, and gene set analyses

Cell typing was performed by manually examining the expression levels of the canonical marker genes for malignant cells (*KRT14*, *KRT17*, *KRT6A*, *KRT5*, *KRT19*, *KRT8*, *KRT16*, *KRT18*, *KRT6B*, *KRT15*, *KRT6C*, *KRTCAP3*, *EPCAM*, *SFN*), fibroblasts (*FAP*, *PDPN*, *COL1A2*, *DCN*, *COL3A1*, *COL6A1*), myocytes (*ACTA1*, *ACTN2*, *MYL2*, *MYH2*), T cells (*CD2*, *CD3D*, *CD3E*, *CD3G*), B/Plasma cells (*SLAMF7*, *CD79A*, *BLNK*, *FCRL5*), macrophages (*CD14*, *CD163*, *CD68*, *FCGR2A*, *CSF1R*), dendritic cells (*CD40*, *CD80*, *CD83*, *CCR7*), mast cells (*CMA1*, *MS4A2*, *TPSAB1*, *TPSB2*) and endothelial cells (*PECAM1*, *VWF*, *ENG*). Deconvolution of the bulk RNA-Seq data was performed using "MuSiC" R package <sup>1</sup>.

The proliferation index score was calculated as the sum of the S scores and G2M scores using the 'CellCycleScoring' function in the Seurat R package. The scores for 'tumor-infiltrating lymphocyte (TIL)' and 'dysfunctional T cell' were calculated as the average expression values of the marker genes, respectively <sup>2,3</sup>.

#### Identification of recurrent CNAs

We developed a CNA calling method to detect the recurrent CNAs, considering the different cell proportions in each sample. We determined the tissue type-specific CNAs and the sample-specific CNAs, respectively. Tissue-specific CNAs were determined by comparing the frequencies of the cells with CNAs in each tissue (*i.e.*, LP vs. NL and CA/LN vs. LP) with a cutoff of the fold difference of the cell proportion with CNAs greater than 10 % and Fisher's exact test ( $P < 0.001$ ) between the tissues. In

addition, sample-specific CNAs of the epithelial cells were determined with a cutoff of a cell proportion with CNA greater than 5 %. Then, we defined the recurrent CNAs as the genes observed in at least two samples with overlap between the tissue-specific and the sample-specific CNAs.

### **Interdependent ligand-receptor interaction analysis**

Data for putative ligand-receptor interactions were obtained from a previous study <sup>4</sup>. First, the average expression levels for each ligand-receptor pair were estimated in the malignant cells and the fibroblasts across the tissue types of NL, LP, and CA/LN, respectively. Then, to determine the interdependent ligand-receptor pairs between CAFs and malignant cells, the ligand-receptor pairs were further filtered by the following criteria. (1) The ligands were expressed, but their receptors were not expressed in CAF (ligand vs. receptor, fold difference of average expression > 0.5). (2) The receptors were expressed, but their ligands were not expressed in the malignant cells (receptor vs. ligand, fold difference of average expression > 0.5). (3) The ligands were expressed in LP than NL (LP vs. NL, fold difference of average expression > 0.1). Because the basal expression levels of the ligands and the receptors in tumor tissues (CA and LN) were substantially higher than those in non-tumor tissues (NL and LP), we applied different cutoffs of the fold difference for each cell type.

### **Pseudo-time trajectory analysis**

Pseudo-time trajectory analyses were performed using Monocle v2 in the R package <sup>5</sup>. UMI count matrices were used to create a CellDataSet object with default parameters. The T cell clusters were identified using the 'FindVariableFeatures' function of the Seurat R package. Gene expression changes according to the pseudo-times were evaluated using the differentialGeneTest function. To construct UMAP-based single-cell state transitions, we applied single-cell trajectory analysis for fibroblasts using the Monocle v3 <sup>6</sup> R package. Dimension reduction and cell clustering were performed using the 'reduce\_dimension,' and 'cluster\_cell' (k = 50) functions.

### **Public data analysis**

Public data sets for scRNA-Seq of HNSCC patients (GSE103322 and GSE164690) were obtained from Gene Expression Omnibus. After data scaling for malignant cells, the malignant clusters, CC0-CC5, were predicted using the classifiers by applying the nearest template prediction (NTP) algorithm.

### **Cell lines**

FaDu cells were obtained from American Type Culture Collection (Manassas, VA, USA) and cultured in Minimum Essential Medium (MEM; Welgene, Gyeongsangbuk-do, South Korea). MSKQLL1, SCCQLL1, SCC15, and SCC25 were kindly provided by Prof. Se-Heon Kim (Yonsei University, Korea). MSKQLL1, SCC15, and SCC25 cells were maintained in Dulbecco's modified Eagle's Medium/Nutrient

Mixture F-12 (DMEM/F12; Welgene). SCCQLL1 were cultured in Minimum Essential Medium (MEM; Welgene). All growth media were supplemented with 10 % fetal bovine serum, and cells were cultured at 37 °C in a humidified atmosphere containing 5 % CO<sub>2</sub>.

### **Immunohistochemistry**

Immunohistochemistry was performed to analyze the expression of galectin-7 (Abcam, ab206435, 1:100). Paraffin tissue sections were briefly deparaffinized with xylene and rehydrated through alcohol and washed in distilled water. After H<sub>2</sub>O<sub>2</sub>-induced inactivation for endogenous peroxidase activity and antigen retrieval in pepsin (Dako, Carpinteria, CA) at 37 °C for 30 min, the tissue sections were incubated with the primary antibody for LGALS7B overnight at 4 °C. After washing, signals were detected with 3,3-diaminobenzidine tetrahydrochloride, and the sections were counterstained with hematoxylin.

For immunofluorescence staining, paraffin sections were blocked with 5% normal goat serum solution before being incubated overnight at 4 °C with the following primary antibodies: anti-COL1A1 (Santa Cruz Biotechnology, sc-293182, 1:40); anti-CD44 (Abcam, ab189524, 1:1,000); anti-TP63 (Abcam, ab97865, 1:200). After several washes in PBS-T, tissue sections were incubated for 2 hours at room temperature with the following secondary antibodies; Fluorescein (FITC) conjugated anti-rabbit IgG antibody (Jackson ImmunoResearch); Cy3 conjugated anti-mouse IgG antibody (Jackson ImmunoResearch). Nuclei were stained with 4',6-diamidino-2-phenylindole (DAPI, Sigma-Aldrich). Immunofluorescent images were taken from each slide using LSM 710 confocal microscope (Carl Zeiss).

### **siRNA-mediated knockdown**

The siRNAs targeting *COL1A1* and *CD44* were purchased from Genolution Pharmaceuticals (Seoul, South Korea), and the siRNAs targeting *TP63*, *ATP1B3*, and negative control were purchased from Dharmacon (SMARTpool: ON-TARGETplus siRNAs). Cells were transfected with siRNA (50 nM) using RNAiMAX (Invitrogen, CA, USA).

### **Cell viability, migration, and invasion assays**

Cells were seeded at a density of  $3 \times 10^3$  cells per well in 96-well plates. At 24 h post-seeding, cells were transfected with siRNA at various times. Cell viability was measured by using the Cell Counting Kit (CCK-8; Dojindo, Tokyo, Japan) according to the manufacturer's instructions. Each experiment was repeated in triplicate.

Cell migration and invasion assays were performed in a 6.5 mm insert with 8.0 µm polyethylene terephthalate membranes in 24-well plates (SPLInsert™ Hanging, SPL Life Sciences). For the migration assay, cells were transfected with siRNAs targeting *TP63*, *ATP1B3*, or negative control. After 24 h, the

transfected cells ( $7 \times 10^4$ ) were seeded in a top chamber of 150  $\mu$ l of serum-free medium. The culture medium with 10% FBS (800  $\mu$ l) was added to the bottom chamber, and the cells were incubated for 18 h. For cell invasion assay, the upper surface of the membrane was pre-coated with 10  $\mu$ g/ml fibronectin (Sigma Aldrich, F1141) in PBS overnight at 4°C.  $1 \times 10^5$  cells/well were seeded on top of the chamber of 150  $\mu$ l of serum-free medium. The culture medium with 10% FBS (800  $\mu$ l) was added to the bottom chamber, and the cells were incubated for 24 h. Then, the migrated or invaded cells were fixed with 4% paraformaldehyde phosphate buffer solution (Wako Pure Chemical Industries, 163-20145) for 5 min and stained with 0.1% crystal violet (Sigma Aldrich, C0775) in 20 % methanol solution for 15 min. Non-migrated cells were removed with a cotton swab, and then the numbers of migrated or invaded cells were counted in the random fields under EVOS M7000 Cell Imaging Systems (x200 magnification, Thermo Fisher Scientific). The bound crystal violet was eluted by adding 400  $\mu$ l of 10 % acetic acid solution (Sigma Aldrich, 45754) into each insert and shaken for 10 min. The eluent on inverted transwells was transferred to a 96-well microplate, and the absorbance at 590 nm was measured using an Epoch Microplate Spectrophotometer (BioTek Instruments). Both experiments were repeated in triplicate, independently.

Co-culture of MSKQLL1 cells and the patient-derived CAFs were implemented using the indirectly co-culture transwell system [6.5 mm insert with 8.0  $\mu$ m polyethylene terephthalate membranes in 24-well plates, SPLInsert™ Hanging, SPL Life Sciences]. The cells were transfected with siCD44 or siCOL1A1, respectively.  $1 \times 10^5$  of the malignant cells were seeded in the top chamber with serum-free medium (150  $\mu$ l), and  $1 \times 10^5$  of the patient-derived CAFs were seeded in the bottom chamber with culture medium (800  $\mu$ l, 10% FBS) and incubated for 18 h.

### **Sphere formation assays**

FaDu cells were transfected with 50 nM of the siRNAs targeting *TP63*, *ATP1B3*, or negative control. After 24 h transfection, the single-cell suspension of the transfected cells ( $3 \times 10^3$  cells/35  $\mu$ l/drop) in a complete culture medium was placed on the inner side of a 96-well hanging drop plate (SPL Life Sciences). After 48 h incubation, the spheroids were harvested from the hanging drop plate by pipetting 100  $\mu$ l of PBS. The spheroids were then washed with PBS and stained using the LIVE/DEAD™ Viability/Cytotoxicity Kit (Thermo Fisher Scientific, L3224) by incubating with calcein AM and Ethidium homodimer-1 (EthD-1) at 37°C for 30 min. A confocal microscope (Nikon A1R, Japan, x20 objective, n = 8) was used for imaging, and z-section imaging was performed.

## Western blotting

Cells were lysed with RIPA buffer (25 mM Tris-HCl pH 7.6, 150 mM NaCl, 1 % NP-40, 1 % sodium deoxycholate, 0.1% SDS) (Sigma) containing a protease and phosphatase inhibitor cocktail (Thermo Fisher Scientific, 78440) on ice for 30 min. Protein samples were separated by SDS-PAGE and transferred to a polyvinylidene difluoride (PVDF) membrane. Each membrane was blocked with 5% skim milk for 1 h at room temperature and incubated overnight with primary antibody (1:1,000) at 4°C. After washing with 0.1% Tween-20 (Sigma-Aldrich, P1379) in Tris-buffered saline (Sigma-Aldrich, T8912), the membranes were incubated with an HRP-conjugated secondary antibody (1:5,000). Proteins were visualized using ECL reagents (GE Healthcare Life Sciences, RPN2235) and detected with ImageQuant™ LAS 4000 (FujiFilm, Tokyo, Japan). Antibodies were obtained from several sources, including anti-CD44 (Cell Signaling Technology, 3570), anti-COL1A1 (Cell Signaling Technology, 72026), anti-GAPDH (Cell Signaling Technology, 5174), anti-TP63 (Abcam, ab97865), anti-ATP1B3 (Santa Cruz Biotechnology, sc-135998), anti-alpha Tubulin (Merck Millipore, CP06).

## RT-PCR

Total RNA was extracted using TRIzol reagent (Thermo Fisher Scientific, 15596026). cDNAs were synthesized with 1 µg of total RNAs and ReverTraAce qPCR RT Master Mix (TOYOBO, Osaka, Japan, FSQ-201) according to the manufacturer's instructions. The transcripts were qualitatively measured using a SYBR Green Realtime PCR Master Mix (TOYOBO, QPK-201) according to the manufacturer's directions and run on a StepOnePlus Real-Time PCR system (Applied Biosystems). Relative expression levels (Rq) of the indicated genes were compared with the GAPDH expression levels of their corresponding samples using the  $\Delta\Delta C_t$  method (StepOne Plus Software v2.3; Applied Biosystems). Primers were obtained from several sources, including *GAPDH* (Qiagen, Hs\_QT00079247), *CXCL8* (Origene, HP200551), *LSGALS7* (Sino Biological, HP101538), *COL1A1* (Qiagen, Hs\_QT00037793), *Foxp3* (Qiagen, Mm\_QT00138369), and *Gapdh* (Qiagen, Mm\_QT01658692).

## References for Supplementary Methods

1. Wang X, Park J, Susztak K, Zhang NR, Li M. Bulk tissue cell type deconvolution with multi-subject single-cell expression reference. *Nature Communications* **10**, 380 (2019).
2. Danaher P, *et al.* Gene expression markers of Tumor Infiltrating Leukocytes. *J Immunother Cancer* **5**, 18 (2017).
3. Li H, *et al.* Dysfunctional CD8 T Cells Form a Proliferative, Dynamically Regulated Compartment within Human Melanoma. *Cell* **176**, 775-789 e718 (2019).
4. Ramilowski JA, *et al.* A draft network of ligand-receptor-mediated multicellular signalling in human. *Nat Commun* **6**, 7866 (2015).
5. Qiu X, *et al.* Reversed graph embedding resolves complex single-cell trajectories. *Nat Methods* **14**, 979-982 (2017).
6. Cao J, *et al.* The single-cell transcriptional landscape of mammalian organogenesis. *Nature* **566**, 496-502 (2019).

## Supplementary Figures

**a**

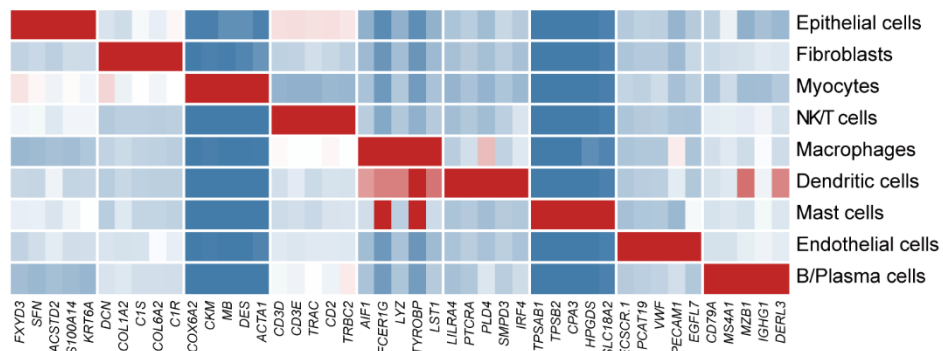

**b**

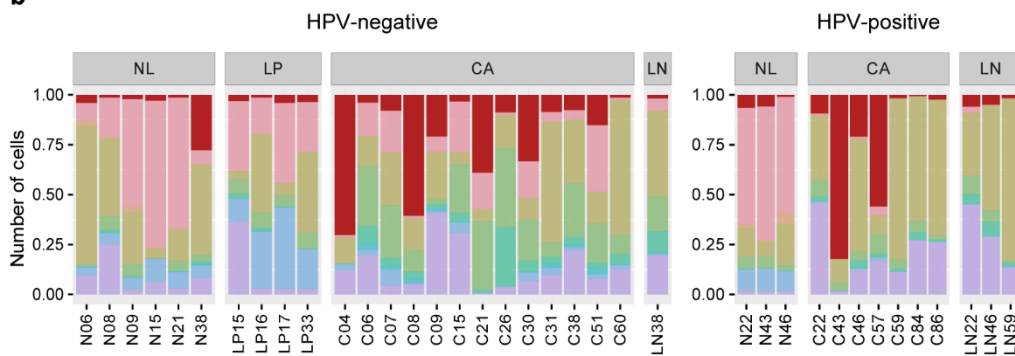

**Supplementary Fig. 1. Expression of cell type cluster markers and distribution of cell types.**

**a.** A heatmap shows the expression levels of the five top-ranked marker genes for each cell type. **b.** Distributions for the proportion of cell types in individual samples are shown.

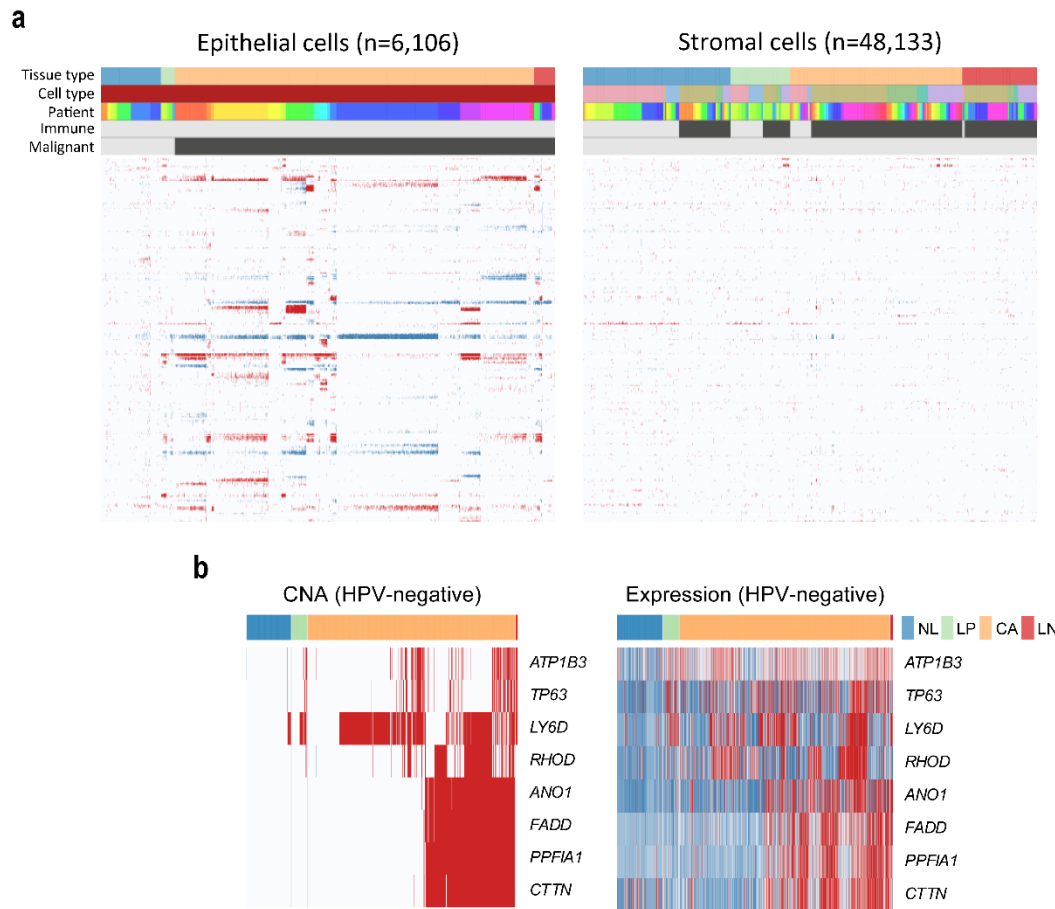

**Supplementary Fig. 2. DNA copy number aberrations during HNSCC progression.**

- a.** Heatmap showing the copy number aberrations (CNAs) inferred from the single-cell RNA-seq data.
- b.** Heatmaps show the CNAs (*left*) and expression levels (*right*) of genes with CNA-dependent transcriptional deregulation in LP or CA (LP; *ATP1B3*, *TP63*, and *LY6D*, CA; *RHOD*, *ANO1*, *FADD*, *PPFIA1*, and *CTTN*) during HNSCC progression.



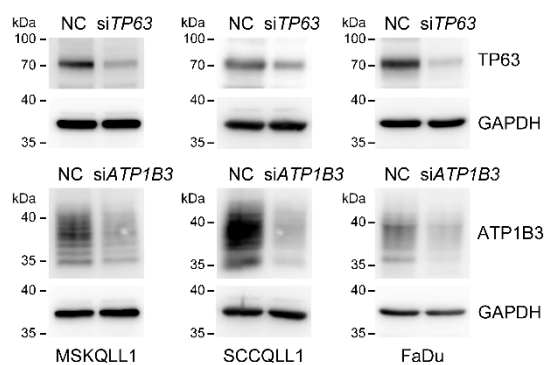

**Supplementary Fig. 3. Effect of *TP63* or *ATP1B3* knockdown in HNSCC cells.**

The MSKQLL1, SCCQLL1, and FaDu cells were treated with siRNAs targeting *TP63*, *ATP1B3*, or non-target control (NC). Cells were harvested with RIPA buffer and subjected to Western blot to detect TP63 or ATP1B3 and GAPDH. Source data are provided as a Source Data file.

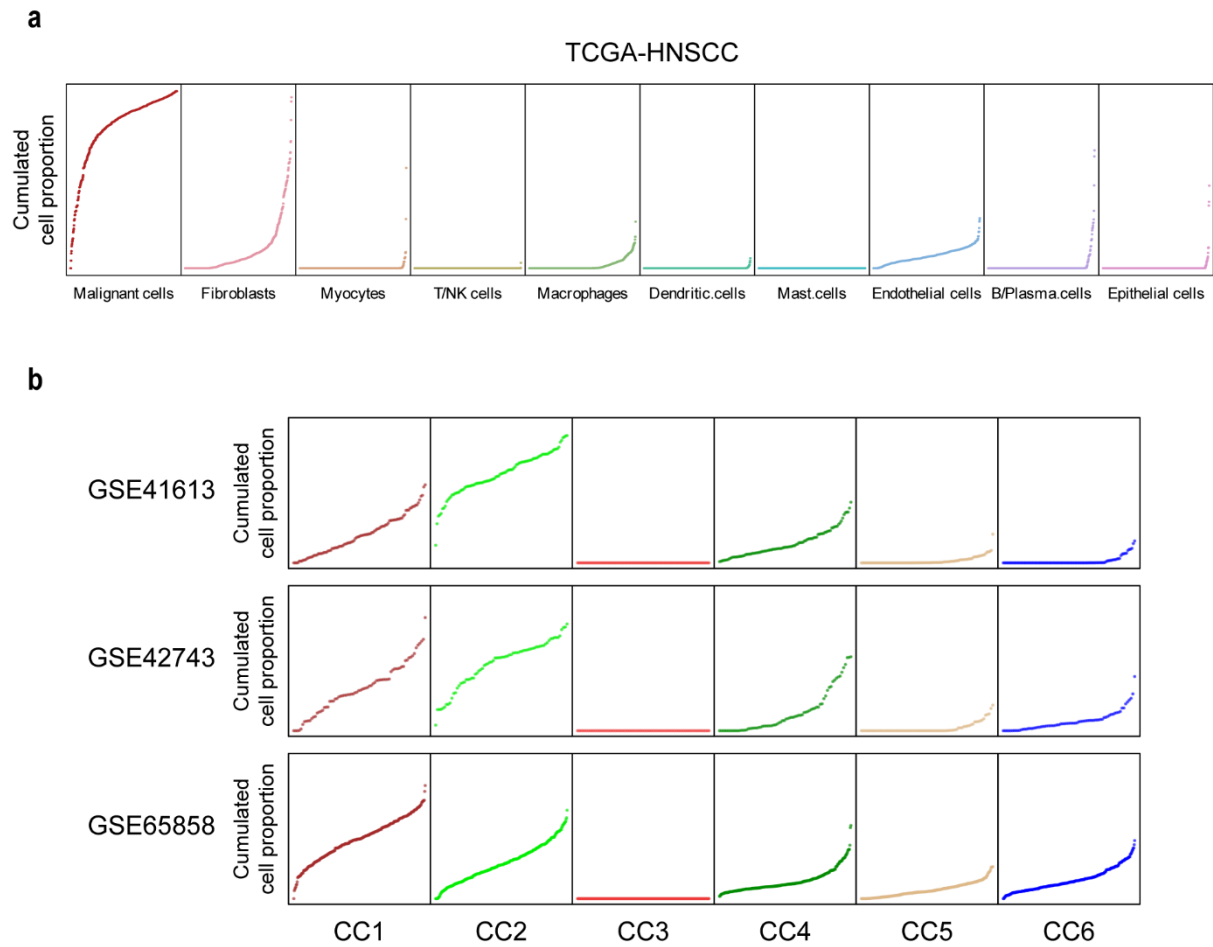

**Supplementary Fig. 4. Deconvolution analysis for cell types and malignant cell clusters.**

**a.** Cumulative proportions of each cell type as measured by deconvolution analysis in the TCGA-HNSCC data set are shown. **b.** Cumulative proportions of each malignant cluster as measured by deconvolution analysis in GSE41613, GSE42743, and GSE65858 are shown. Samples are ordered according to the proportion of each cluster.

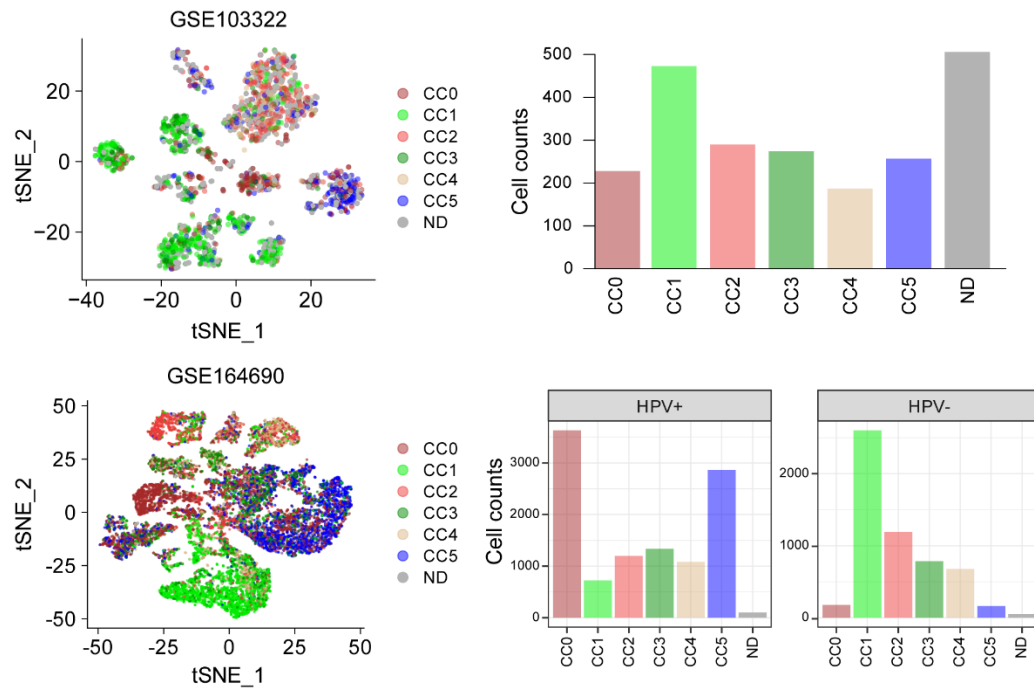

**Supplementary Fig. 5. Nearest template prediction analysis to classify malignant cell clusters.**

The malignant cell clusters (CC0-CC5) are indicated in t-SNE plots (*left*) and cell counts are shown across the malignant cell clusters (*right*) in GSE103322 (*top*) and GSE164690 (*bottom*) data sets. Each malignant cell was classified into malignant cell clusters using NTP algorithm.

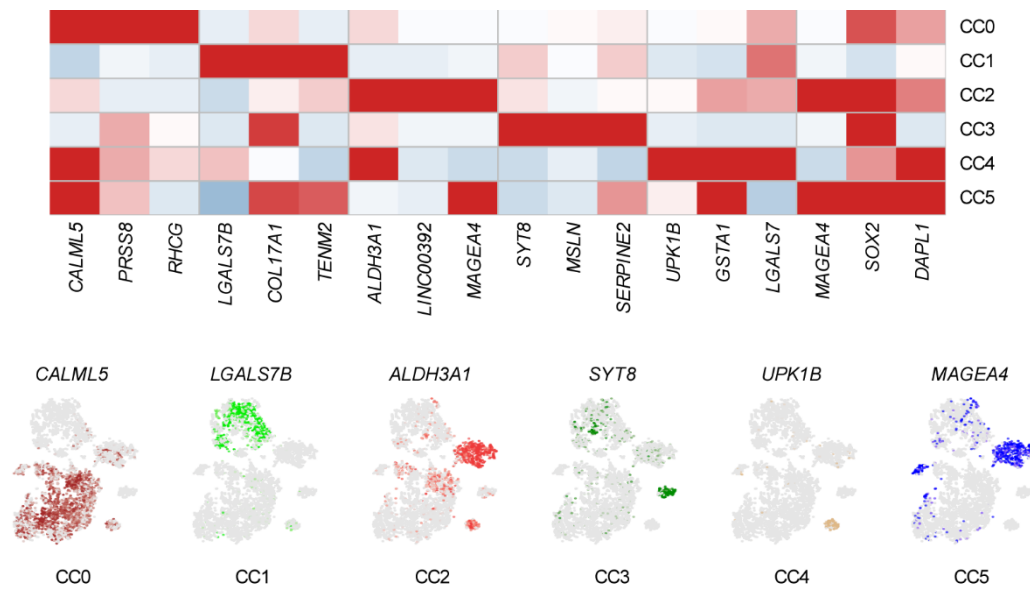

**Supplementary Fig. 6. Malignant cell clusters of HNSCC.**

Expression levels of top-ranked marker genes for each cell type are shown in a heatmap (*top*) and t-SNE plots (*bottom*).

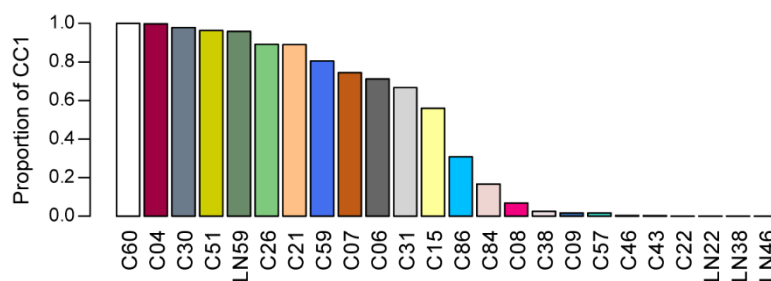

**Supplementary Fig. 7. Distribution of CC1 malignant cluster in HNSCC patients.**

A bar plot showing the proportion of CC1 clusters in each of the HNSCC samples.

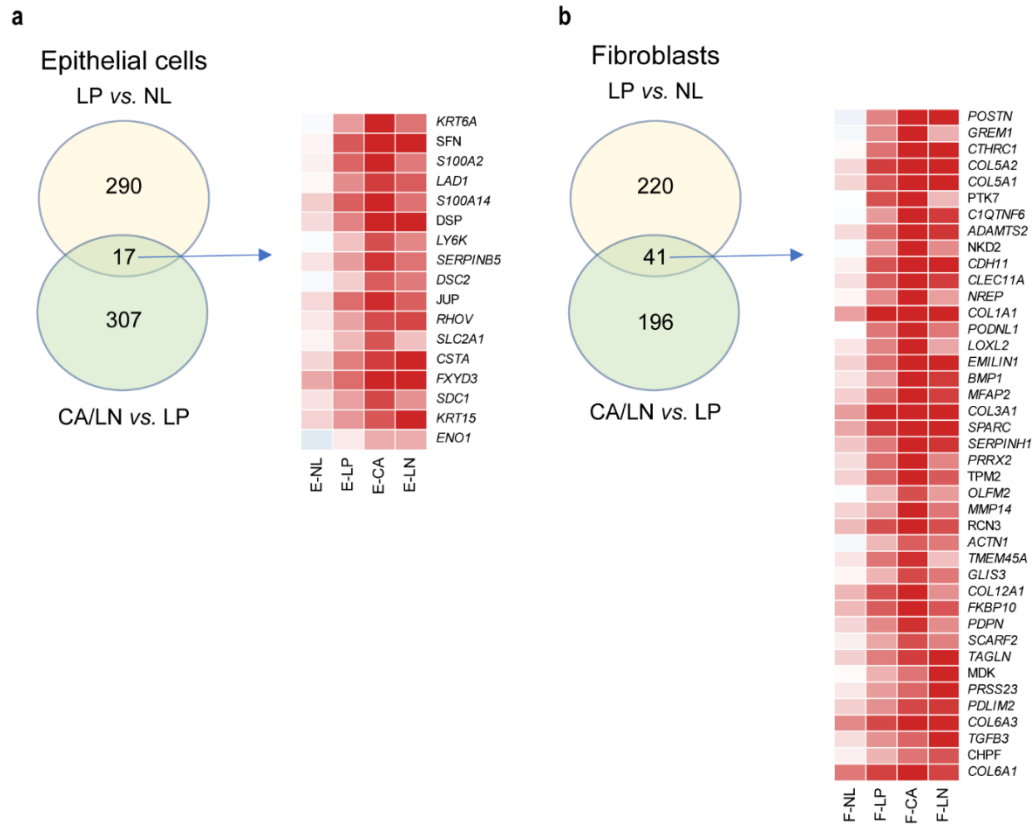

**Supplementary Fig. 8. Identification of the genes with stepwise expression in epithelial cells or fibroblasts.**

The stepwisely expressed genes during HNSCC progression (LP vs. NL, CA/LN vs. LP; Permuted two-sided Student's t-test  $P < 0.001$ , fold difference  $> 0.5$ ) in epithelial cells **(a)** and fibroblasts **(b)** are shown.

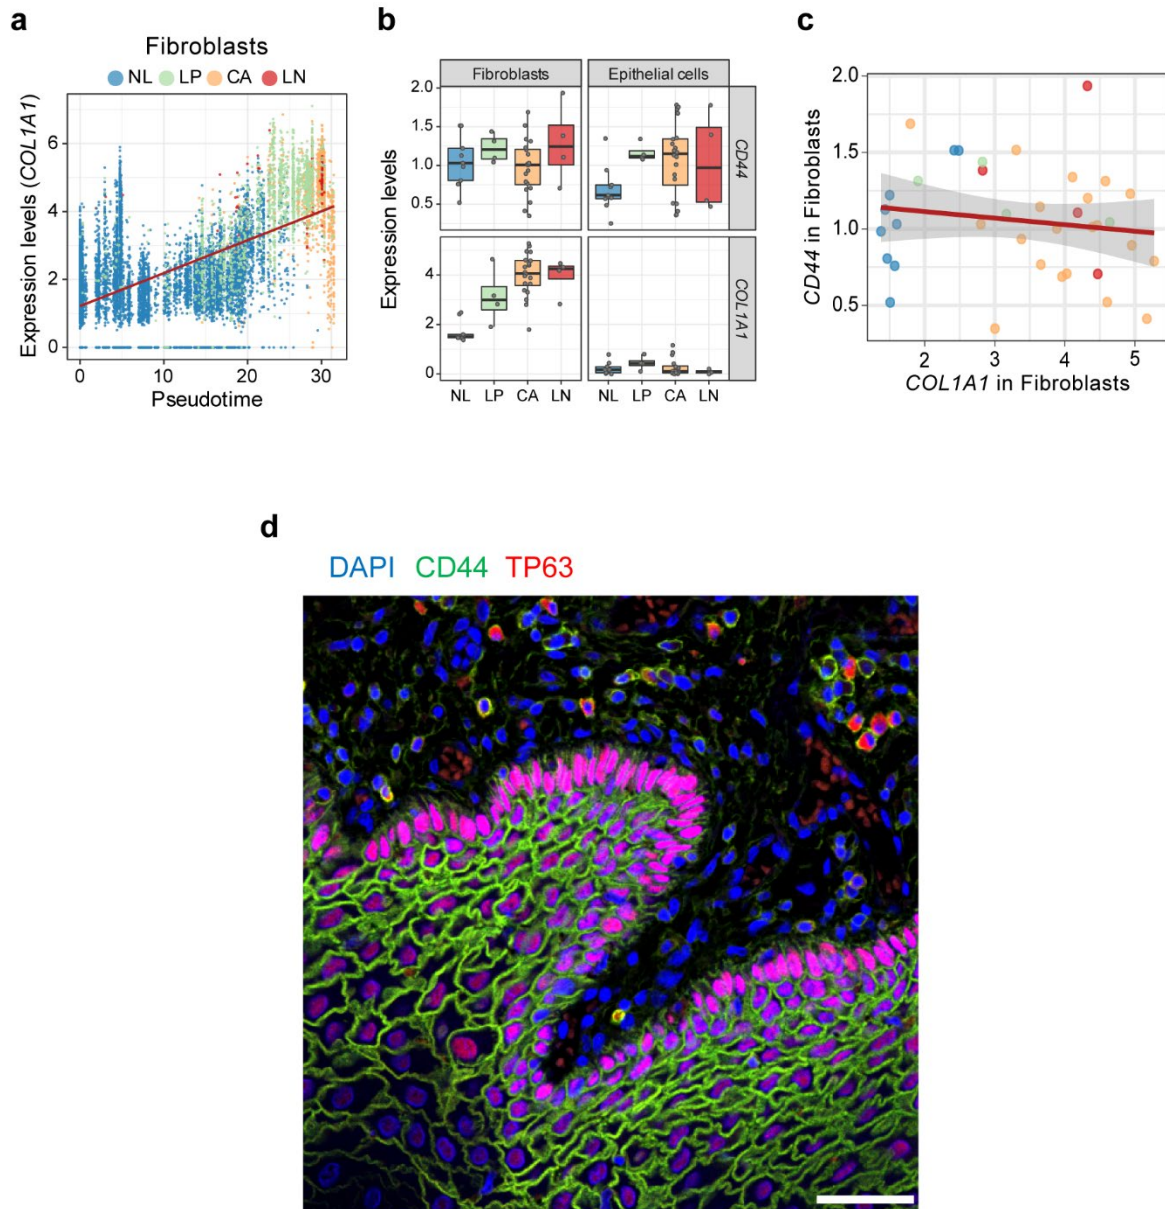

**Supplementary Fig. 9. Fibroblast-derived *COL1A1* expression interacts with *CD44* in malignant cells.**

**a.** Correlations between pseudo-times and *COL1A1* expression levels in fibroblasts are shown. **b.** The expression levels of *CD44* and *COL1A1* in fibroblasts ( $n=12,336$ ) and epithelial cells ( $n=6,106$ ) according to the tissue types are shown. Box plots show median (center line), the upper and lower quantiles (box) and the range of the data (whiskers). **c.** Correlations between expression levels of *CD44* and *COL1A1* in fibroblasts are shown. The gray shading represents 95% confidence interval (CI). **d.** An immunohistochemical image shows the expression of *CD44* (green) and *TP63* (red) in malignant cells.  $n = 3$ , Scale bar, 50 $\mu$ m.

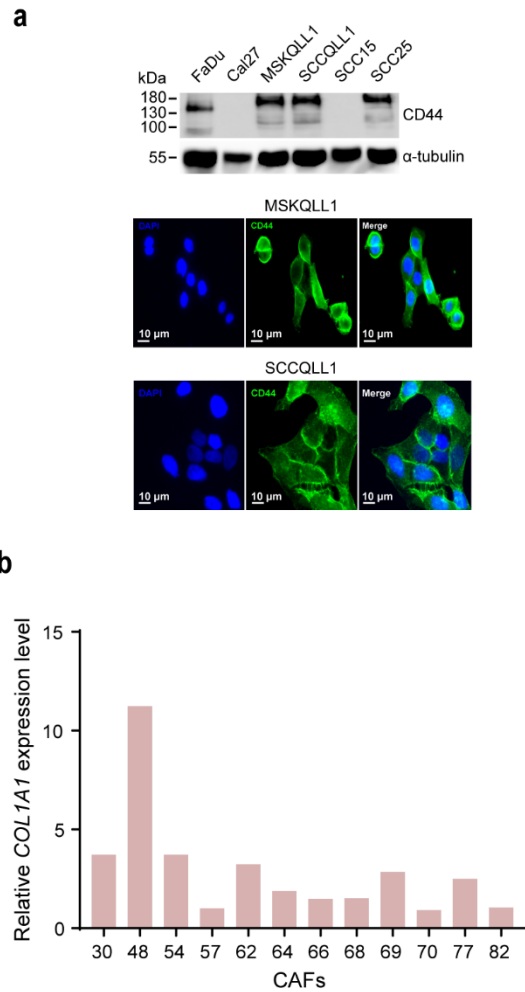

**Supplementary Fig. 10. Validation of CD44 expression in malignant cells and COL1A1 in CAFs.**

**a.** Western blots show the expression levels of CD44 in different HNSCC cell lines (*top*). Immunostaining shows the expression of CD44 in MSKQLL1 and SCCQLL1 cell lines, respectively (*bottom*). **b.** Relative COL1A1 expression in the different CAF cells is measured by real-time RT-PCR. Source data are provided as a Source Data file.

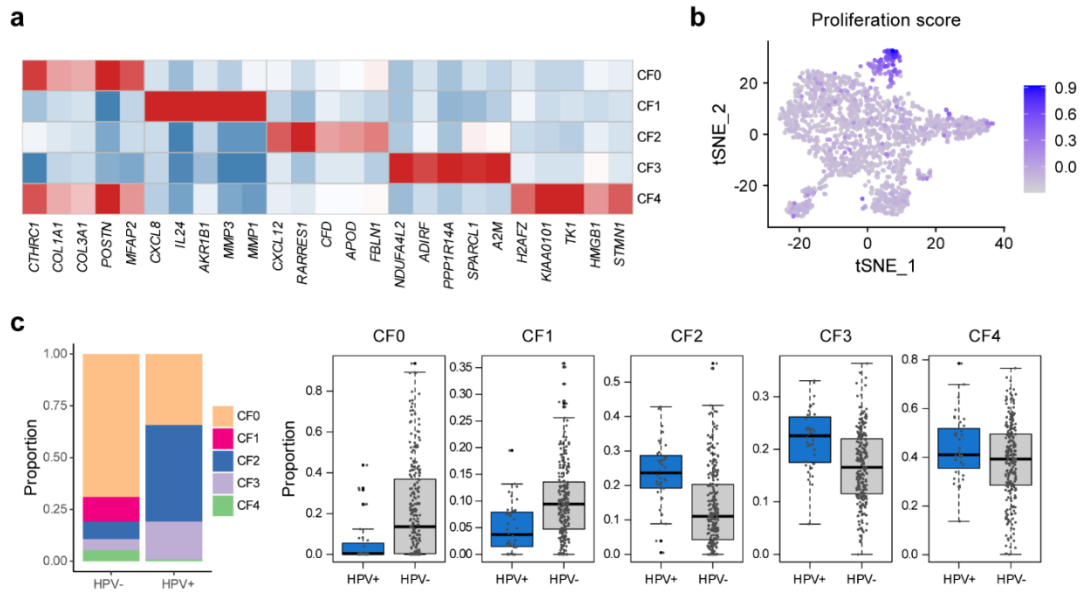

**Supplementary Fig. 11. CAF cell clusters of HNSCC.**

**a.** A heatmap shows the expression levels of marker genes for each CAF cell cluster. **b.** Proliferation scores in CAF cells are shown in a t-SNE plot. **c.** A bar plot shows the proportion of CAF cell clusters (CF0-CF4) according to the HPV infection status in scRNA-Seq data (*left*). Deconvoluted proportions according to the HPV infection status for each CAF cluster in TCGA-HNSCC data are shown (*right*). Box plots show median (center line), the upper and lower quantiles (box) and the range of the data (whiskers).

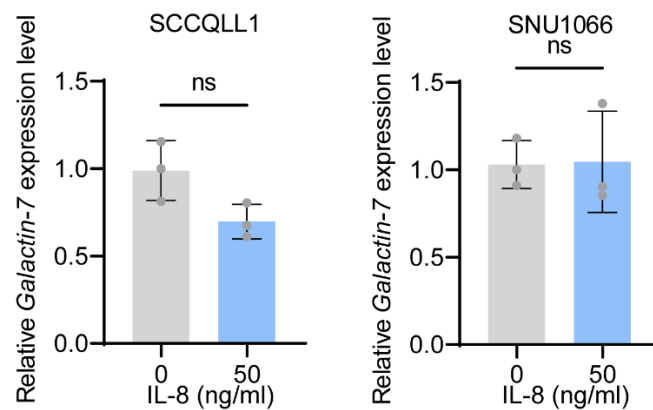

**Supplementary Fig. 12. Effect of IL-8 treatment on galectin-7 expression.**

Effects of IL-8 (50 ng/mL) treatment in galectin-7 expression are shown in SCCQ11 and SNU1066 cells. N.S, not significant.  $n = 3$  biological independent experiments. Data are shown as mean  $\pm$  SD. Source data are provided as a Source Data file.



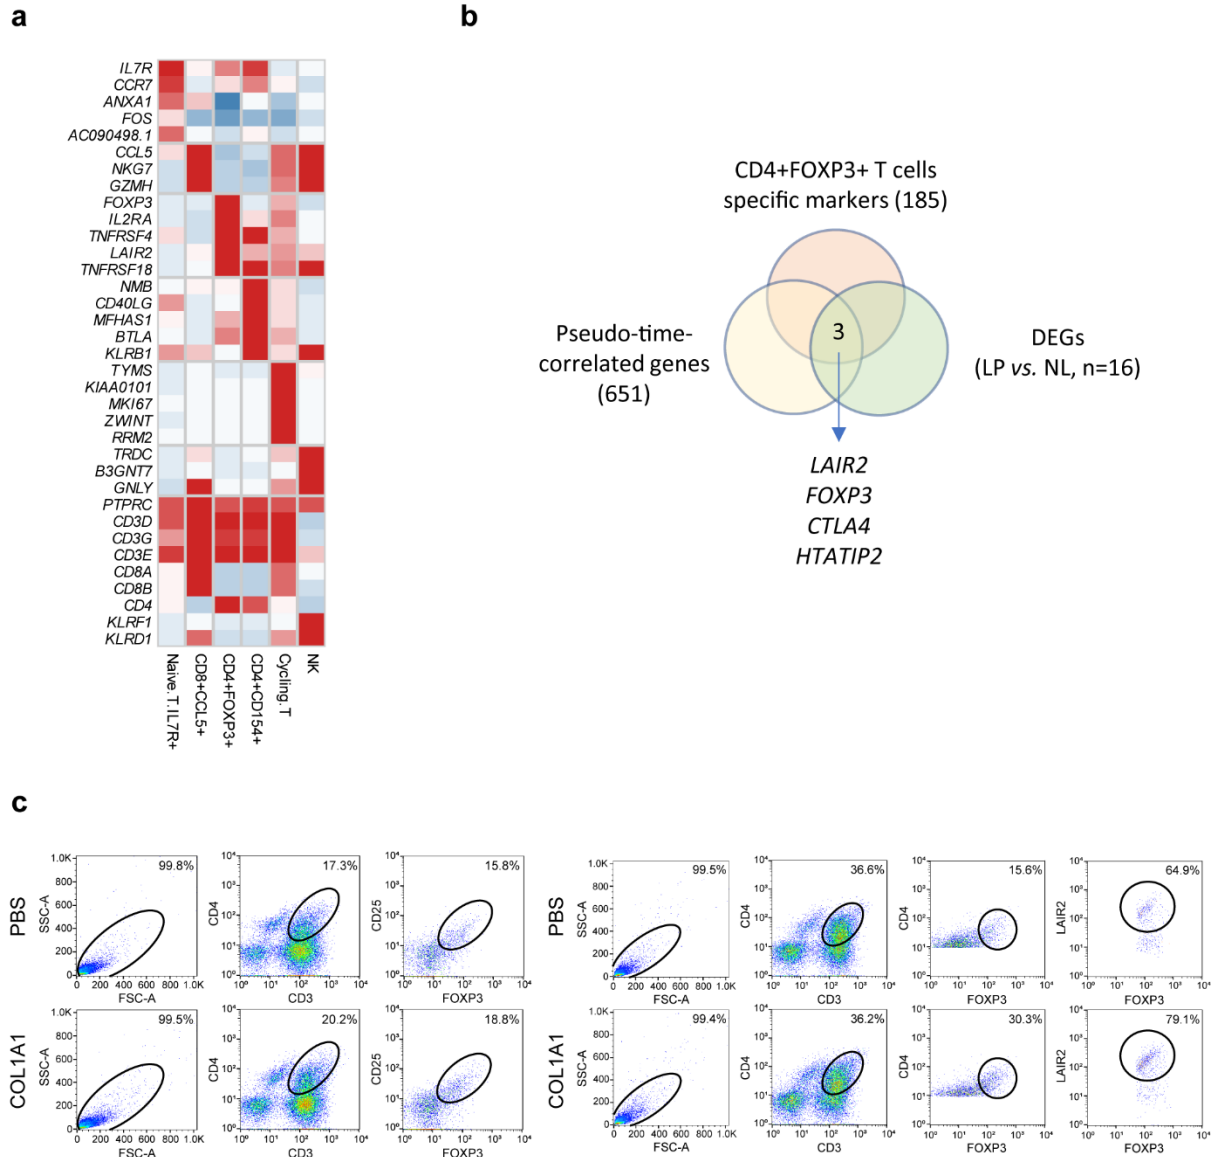

**Supplementary Fig. 13. T/NK cell clusters of HNSCC and identification of the potential driver genes for Treg transformation.**

**a.** A heatmap shows the expression levels of marker genes for each T/NK cell cluster and known cell type markers, including *PTPRC* (*CD45*), *CD3D*, *CD3G*, *CD3E*, *CD8A*, *CD8B*, *CD4*, *KLRF1*, and *KLRD1*. **b.** A Venn diagram shows the overlapped genes among the marker genes for Tregs (CD4+FOXP3+ T cells), pseudo-time-correlated genes, and the DEGs for LP vs. NL. **c.** Flow cytometry gating strategy used to define LAIR2+FOXP3+ (left) and LAIR2+FOXP3+CD25+ (right) Treg cell population from patient PBMC is shown. The PMBCs were cultured on Collagen type 1A1 (10  $\mu\text{g}/\text{cm}^2$ ) coated (top) or non-coated plate (bottom) for 36 hr.

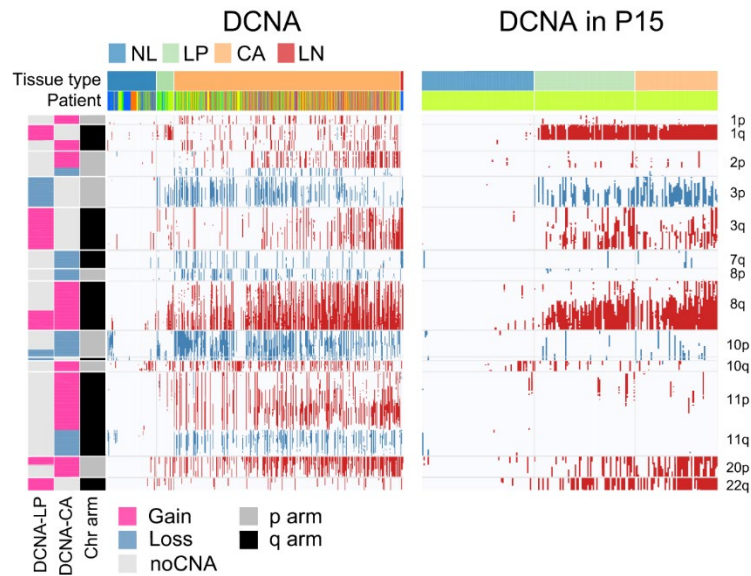

**Supplementary Fig. 14. Differential DNA copy number aberrations during HNSCC progression.**

Heatmaps show the stepwisely differential CNAs during HNSCC in all epithelial cells (*left*) and cells of patient P15 (*right*). The DCNAs for LP (DCNA-LP) and CA (DCNA-CA) tissue are indicated in the left bar.

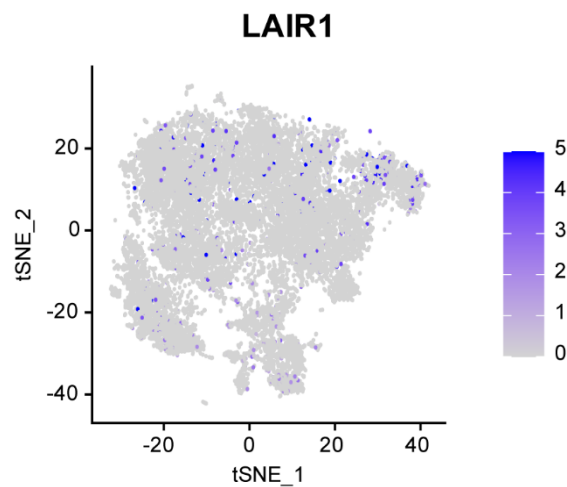

**Supplementary Fig. 15. *LAIR1* is less expressed in T/NK cells.**

A t-SNE plot shows the expression levels of *LAIR1* in T/NK cells.

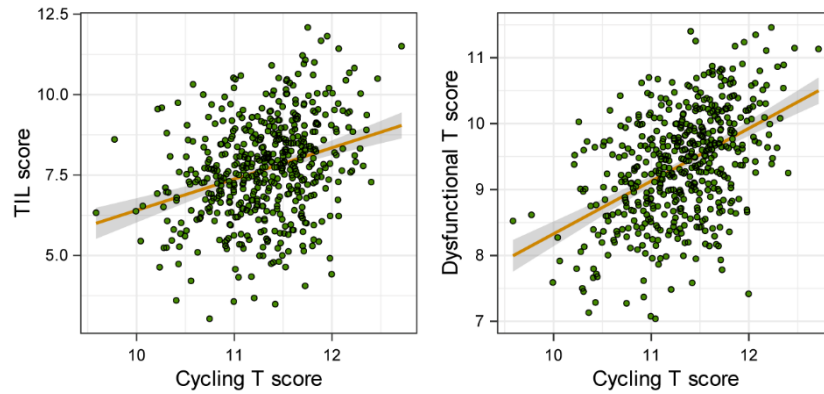

**Supplementary Fig. 16. Correlation of Cycling T cells with TIL and dysfunctional T cell signatures in TCGA-HNSCC.**

Cycling T score correlated with TIL score (*left*) and dysfunctional T score (*right*) in TCGA-HNSCC data. The gray shading represents 95% confidence interval (CI). Cycling T cell, TIL, and dysfunctional T cell scores are estimated as mean expression values of their marker genes, respectively.

## Supplementary Tables

**Supplementary Table 1. Patients and samples included in scRNA-Seq data.**

| Patient ID | Tumor subsite | HPV infection | Tumor stage | Sample ID |      |     |      |
|------------|---------------|---------------|-------------|-----------|------|-----|------|
|            |               |               |             | NL        | LP   | CA  | LN   |
| P4         | OC            | Negative      | T2N2a       |           |      | C04 |      |
| P6         | OC            | Negative      | T2N1        | N06       |      | C06 |      |
| P7         | OC            | Negative      | T2N0        |           |      | C07 |      |
| P8         | OP            | Negative      | T1N0        | N08       |      | C08 |      |
| P9         | OP            | Negative      | T2N0        | N09       |      | C09 |      |
| P15        | OC            | Negative      | T1N0        | N15       | LP15 | C15 |      |
| P16        | OC            | Negative      |             |           | LP16 |     |      |
| P17        | OC            | Negative      |             |           | LP17 |     |      |
| P21        | OC            | Negative      | T4aN1       | N21       |      | C21 |      |
| P22        | OP            | Positive      | T2N2        | N22       |      | C22 | LN22 |
| P26        | OC            | Negative      | T2N0        |           |      | C26 |      |
| P30        | OC            | Negative      | T2N0        |           |      | C30 |      |
| P31        | OC            | Negative      | T2N2        |           |      | C31 |      |
| P33        | OC            | Negative      |             |           | LP33 |     |      |
| P38        | HP            | Negative      | T4aN3b      | N38       |      | C38 | LN38 |
| P43        | OP            | Positive      | T3N0        | N43       |      | C43 |      |
| P46        | OP            | Positive      | T2N1        | N46       |      | C46 | LN46 |
| P51        | OC            | Negative      | T2N1        |           |      | C51 |      |
| P57        | OP            | Positive      | T1N0        |           |      | C57 |      |
| P59        | OP            | Positive      | T3N2b       |           |      | C59 | LN59 |
| P60        | OC            | Negative      | T4aN0       |           |      | C60 |      |
| P84        | OP            | Positive      | T2N1        |           |      | C84 |      |
| P86        | OP            | Positive      | T2N0        |           |      | C86 |      |

OC, oral cavity; OP, oropharynx; HP, hypopharynx; NL, normal; LP, leukoplakia; CA, primary cancer; LN, metastasized lymph nodes.

**Supplementary Table 2. Univariate and multivariate analysis for CC1 cluster in HPV-negative HNSCC cohorts.**

| Variable               |                         | Univariate analysis (OS) |           |                       | Multivariate analysis (OS) |           |                       |
|------------------------|-------------------------|--------------------------|-----------|-----------------------|----------------------------|-----------|-----------------------|
|                        |                         | HR                       | 95% CI    | <i>P</i> <sup>a</sup> | HR                         | 95% CI    | <i>P</i> <sup>a</sup> |
| <b>GSE41613 cohort</b> |                         |                          |           |                       |                            |           |                       |
| <b>CC1 %</b>           | Low (≤70th percentile)  |                          |           |                       |                            |           |                       |
|                        | High (>70th percentile) | 2.58                     | 1.47-4.52 | <b>0.001*</b>         | 2.68                       | 1.50-4.77 | <b>0.001*</b>         |
| <b>Age</b>             | ≤55                     |                          |           |                       |                            |           |                       |
|                        | >55                     | 0.74                     | 0.42-1.29 | 0.281                 | 0.81                       | 0.46-1.42 | 0.456                 |
| <b>Sex</b>             | Female                  |                          |           |                       |                            |           |                       |
|                        | Male                    | 1.09                     | 0.60-1.29 | 0.281                 | 1.31                       | 0.72-2.42 | 0.377                 |
| <b>GSE42743 cohort</b> |                         |                          |           |                       |                            |           |                       |
| <b>CC1 %</b>           | Low (≤70th percentile)  |                          |           |                       |                            |           |                       |
|                        | High (>70th percentile) | 2.24                     | 1.18-4.25 | <b>0.013*</b>         | 2.33                       | 1.22-4.44 | <b>0.011*</b>         |
| <b>Age</b>             | ≤55                     |                          |           |                       |                            |           |                       |
|                        | >55                     | 1.29                     | 0.68-2.44 | 0.431                 | 1.14                       | 0.60-2.18 | 0.692                 |
| <b>Gender</b>          | Female                  |                          |           |                       |                            |           |                       |
|                        | Male                    | 0.68                     | 0.34-1.36 | 0.270                 | 0.62                       | 0.31-1.26 | 0.190                 |

<sup>a</sup>Statistical tests were performed with log-rank test.

**Supplementary Table 3. Reagents and resources used in the experiments.**

| REAGENT or RESOURCE                                                   | SOURCE                      | IDENTIFIER                                                                                                                                                                                                                        |
|-----------------------------------------------------------------------|-----------------------------|-----------------------------------------------------------------------------------------------------------------------------------------------------------------------------------------------------------------------------------|
| <b>Antibodies</b>                                                     |                             |                                                                                                                                                                                                                                   |
| Rabbit monoclonal anti-Galectin 7                                     | Abcam                       | Cat#ab206435                                                                                                                                                                                                                      |
| Mouse monoclonal anti-COL1A1                                          | Santa Cruz Biotechnology    | Cat#sc-293182                                                                                                                                                                                                                     |
| Mouse monoclonal anti-ATP1B3                                          | Santa Cruz Biotechnology    | Cat#sc-135998                                                                                                                                                                                                                     |
| Rabbit monoclonal anti-CD44                                           | Abcam                       | Cat#ab189524                                                                                                                                                                                                                      |
| Rabbit polyclonal anti-TP63                                           | Abcam                       | Cat#ab97865                                                                                                                                                                                                                       |
| Fluorescein (FITC)-conjugated goat anti-rabbit IgG secondary antibody | Jackson ImmunoResearch      | Cat#111-095-003                                                                                                                                                                                                                   |
| Cy3-conjugated goat anti-mouse IgG secondary antibody                 | Jackson ImmunoResearch      | Cat#115-165-003                                                                                                                                                                                                                   |
| Mouse monoclonal anti-CD44                                            | Cell Signaling Technologies | Cat#3570                                                                                                                                                                                                                          |
| Rabbit monoclonal anti-COL1A1                                         | Cell Signaling Technologies | Cat#72026                                                                                                                                                                                                                         |
| Rabbit monoclonal anti-GAPDH                                          | Cell Signaling Technologies | Cat#5174                                                                                                                                                                                                                          |
| Mouse monoclonal anti- $\alpha$ -tubulin                              | Merck Millipore             | Cat#CP06                                                                                                                                                                                                                          |
| Anti-rabbit IgG, HRP-linked antibody                                  | Cell Signaling Technologies | Cat#7074                                                                                                                                                                                                                          |
| Anti-mouse IgG, HRP-linked antibody                                   | Cell Signaling Technologies | Cat#7076                                                                                                                                                                                                                          |
| Mouse monoclonal anti-CD3                                             | Biogems                     | Cat#05112-20                                                                                                                                                                                                                      |
| Mouse monoclonal anti-CD28                                            | Biogems                     | Cat#10312-20                                                                                                                                                                                                                      |
| Mouse monoclonal anti-CD4, PE-cy7                                     | Biogems                     | Cat#06121-77                                                                                                                                                                                                                      |
| Rat monoclonal anti-FOXP3, APC                                        | Invitrogen                  | Cat#17-4776-42                                                                                                                                                                                                                    |
| Mouse monoclonal anti-CD25, PE-cy7                                    | Invitrogen                  | Cat#25-0259-42                                                                                                                                                                                                                    |
| Mouse monoclonal anti-CD3, PE                                         | Invitrogen                  | Cat#12-0038-42                                                                                                                                                                                                                    |
| Mouse monoclonal anti-CD4, FITC                                       | Invitrogen                  | Cat#11-0048-42                                                                                                                                                                                                                    |
| Mouse monoclonal anti-LAIR2 Alexa 488-conjugated antibody             | R&D systems                 | Cat#IC2665G                                                                                                                                                                                                                       |
| <b>Chemicals, Peptides, and Recombinant Proteins</b>                  |                             |                                                                                                                                                                                                                                   |
| 4',6-diamidino-2-phenylindole (DAPI)                                  | Sigma-Aldrich               | Cat#D9542                                                                                                                                                                                                                         |
| Collagen, Type 1 solution from rat tail                               | Sigma-Aldrich               | Cat#C3867                                                                                                                                                                                                                         |
| Recombinant Mouse CXCL2                                               | PeproTech                   | 212-12                                                                                                                                                                                                                            |
| Recombinant Human TGF- $\beta$                                        | PeproTech                   | 100-21                                                                                                                                                                                                                            |
| Recombinant Human Galectin 7                                          | Abcam                       | Cat#ab62616                                                                                                                                                                                                                       |
| Recombinant Human CXCL8                                               | PeproTech                   | Cat#P10145                                                                                                                                                                                                                        |
| Crystal violet                                                        | Sigma                       | Cat#C3886                                                                                                                                                                                                                         |
| <b>Critical Commercial Assays</b>                                     |                             |                                                                                                                                                                                                                                   |
| Chromium Single Cell 3' Feature Barcode Library Kit v2                | 10X Genomics                | Cat#PN-120234                                                                                                                                                                                                                     |
| Chromium Next GEM Single Cell 3' GEM, Library & Gel Bead Kit v2       | 10X Genomics                | Cat#PN-120235                                                                                                                                                                                                                     |
| <b>Public Data</b>                                                    |                             |                                                                                                                                                                                                                                   |
| HNSCC scRNA-Seq data                                                  | Puram et al., 2017          | GEO: GSE103322                                                                                                                                                                                                                    |
| HNSCC scRNA-Seq data                                                  | Kürten et al., 2021         | GEO: GSE164690                                                                                                                                                                                                                    |
| TCGA-HNSCC                                                            | National Cancer Institute   | <a href="https://portal.gdc.cancer.gov">https://portal.gdc.cancer.gov</a>                                                                                                                                                         |
| Bulk RNA-seq data – HNSCC 97 cohort                                   | Lohavanichbutr et al., 2013 | GEO: GSE41613                                                                                                                                                                                                                     |
| Bulk RNA-seq data – HNSCC 74 cohort                                   | Lohavanichbutr et al., 2013 | GEO: GSE42743                                                                                                                                                                                                                     |
| Bulk RNA-seq data – HNSCC 270 cohort                                  | Wichmann et al., 2015       | GEO: GSE65858                                                                                                                                                                                                                     |
| <b>Software and Algorithms</b>                                        |                             |                                                                                                                                                                                                                                   |
| R v4.1.0                                                              | R Core Team                 | <a href="https://www.r-project.org">https://www.r-project.org</a>                                                                                                                                                                 |
| 10x Cell Ranger v2.1.1                                                | 10x Genomics                | <a href="https://support.10xgenomics.com/single-cell-gene-expression/software/pipelines/latest/what-is-cell-ranger">https://support.10xgenomics.com/single-cell-gene-expression/software/pipelines/latest/what-is-cell-ranger</a> |

|                 |                        |                                                                                                                           |
|-----------------|------------------------|---------------------------------------------------------------------------------------------------------------------------|
| Seurat v4.0.3   | CRAN (R 4.1.0)         | <a href="https://cran.r-project.org/">https://cran.r-project.org/</a>                                                     |
| Harmony 1.0     | Korsunsky et al., 2019 | <a href="https://portals.broadinstitute.org/harmony/index.html">https://portals.broadinstitute.org/harmony/index.html</a> |
| inferCNV 1.8.0  | Bioconductor           | <a href="https://bioconductor.org">bioconductor.org</a>                                                                   |
| Monocle2 2.20.0 | Bioconductor           | <a href="https://bioconductor.org">bioconductor.org</a>                                                                   |
| Monocle3 1.0.0  | Bioconductor           | <a href="https://bioconductor.org">bioconductor.org</a>                                                                   |
| MuSiC           | Wang et al., 2019a     | <a href="https://xuranw.github.io/MuSiC/articles/MuSiC.html">https://xuranw.github.io/MuSiC/articles/MuSiC.html</a>       |
| DNAcopy 1.66.0  | Bioconductor           | <a href="https://bioconductor.org">bioconductor.org</a>                                                                   |
